# Supplementary material for: Microrheology for Hi-C Data Reveals the Spectrum of the Dynamic 3D Genome Organization
Source: PubMed Central journal article supplement — Biophys J. 2020 Mar 3;118(9):2220–8. doi: 10.1016/j.bpj.2020.02.020 (PMC7203008; doi:10.1016/j.bpj.2020.02.020), 2020-03-03
Supplement: mmc1.pdf [file mmc1.pdf]

**Biophysical Journal, Volume 118**

**Supplemental Information**

**Microrheology for Hi-C Data Reveals the Spectrum of the Dynamic 3D  
Genome Organization**

**Soya Shinkai, Takeshi Sugawara, Hisashi Miura, Ichiro Hiratani, and Shuichi Onami**

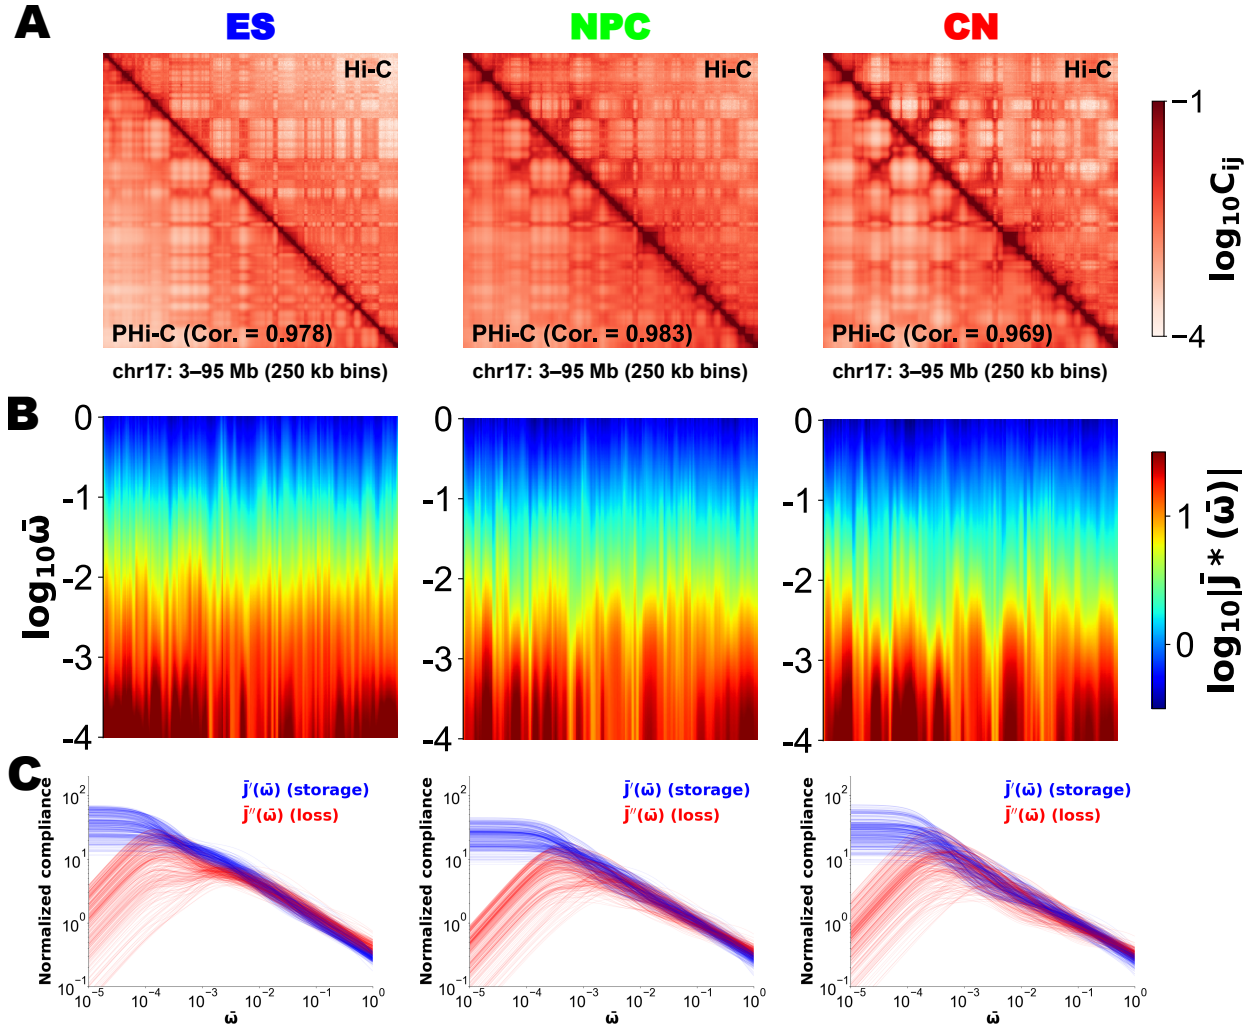

**Figure S1:** (A) Contact matrices for chromosome 17 during neural differentiation of mouse embryonic stem (ES) (Left), neural progenitor (NPC) (Middle), and cortical neuron (CN) (Right) cells at 250-kb resolution. Upper right and lower left elements in each matrix correspond to the normalized Hi-C contact probabilities and the optimized ones by PHi-C, respectively. (B) Spectra of the normalized complex compliance  $|\bar{J}^*(\bar{\omega})|$  for chromosome 17 in ES (Left), NPC (Middle), and CN (Right) cells. Along the genomic coordinate and the logarithmic frequency  $\log_{10} \bar{\omega}$ , a spectrum of  $|\bar{J}^*(\bar{\omega})|$  is depicted as a heat-map. (C) Frequency-dependent normalized storage (blue)

and loss (red) compliances,  $\bar{J}'(\bar{\omega}; n)$  and  $\bar{J}''(\bar{\omega}; n)$ , for all genomic regions  $n (= 0, 1, \dots, 367)$  on chromosome 17 in ES (Left), NPC (Middle), and CN (Right) cells.

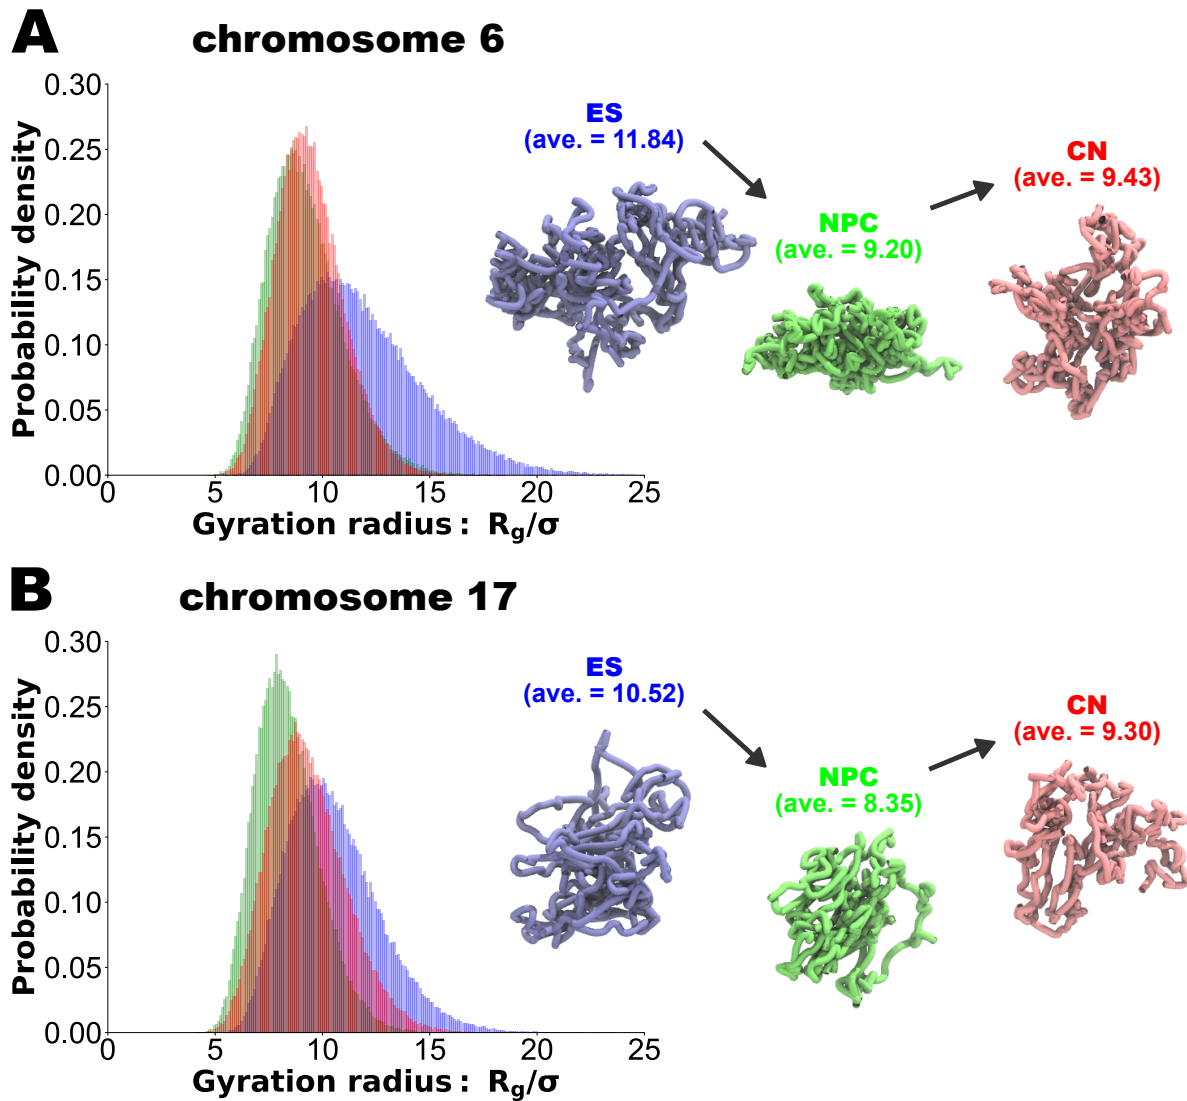

**Figure S2:** Probability density analysis of the normalized gyration radius  $R_g/\sigma$  of  $10^5$  conformations for chromosome 6 (A) and 17 (B) of mouse embryonic stem (ES; blue), neural progenitor (NPC; green), and cortical neuron (CN; red) cells. Snapshots of the polymer conformations with the average gyration radius are displayed.

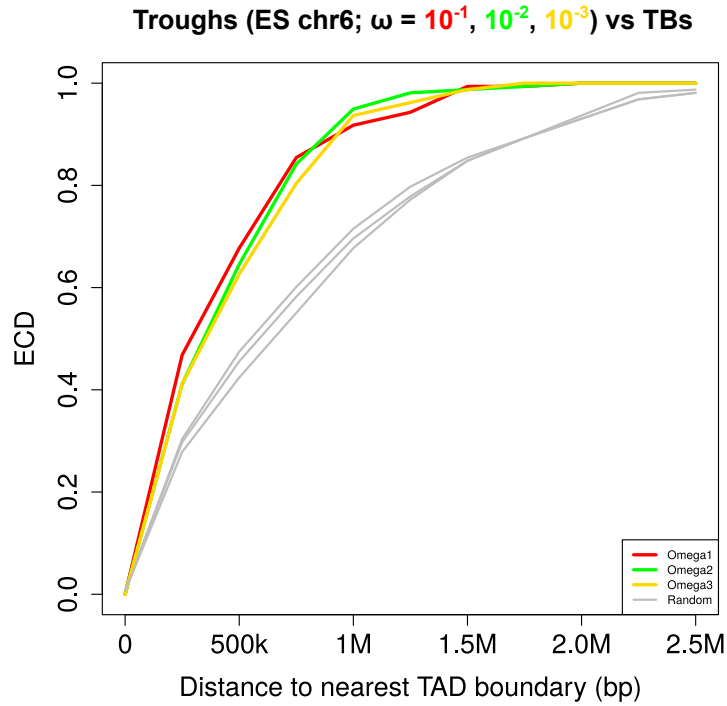

**Figure S3:** Cumulative probability analysis for TAD boundaries and the genomic positions of the troughs. A cumulative probability analysis of the distance between the trough positions and the nearest TAD boundaries on chromosome 6 in mouse embryonic stem (ES) cells. Red, green, gold, and grey represent the troughs from the frequency  $\bar{\omega} = 10^{-1}, 10^{-2}$  and  $10^{-3}$ , and randomly permuted (control), respectively, with the former three significantly closer to the TAD boundaries than control ( $p = 9.42 \times 10^{-6}, 9.44 \times 10^{-6}, 1.04 \times 10^{-5}$ , respectively, by a two-sided Wilcoxon rank sum test). The  $p$ -values in the same analysis for chromosome 17 are also summarized on Table S1.

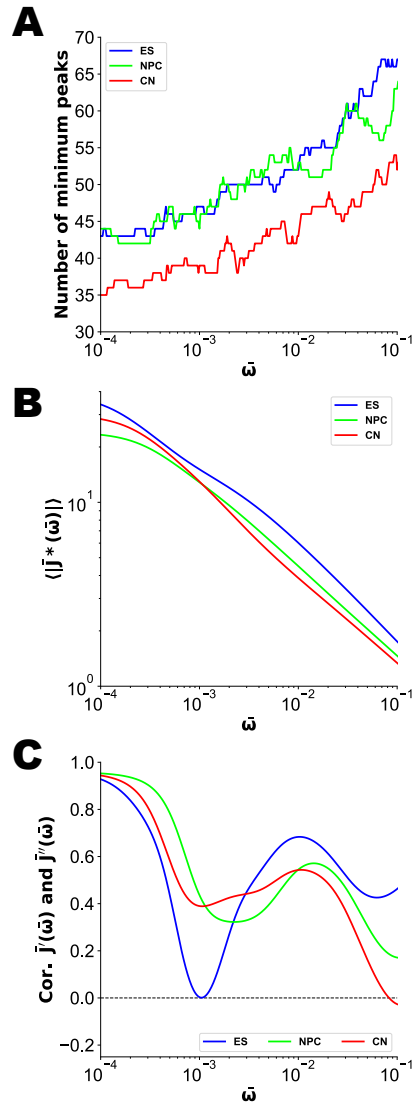

**Figure S4:** (A) Frequency dependence of the number of minimum peaks as the troughs on  $|\bar{J}^*(\bar{\omega})|$  for chromosome 17 in mouse embryonic stem (ES), neural progenitor (NPC), and cortical neuron (CN) cells. (B) Frequency-dependent average values of  $|\bar{J}^*(\bar{\omega})|$  along chromosome 17 for mouse ES, NPC, and CN cells. (C) Frequency-dependent Pearson's correlation between the normalized storage and loss compliances,  $\bar{J}'(\bar{\omega})$  and  $\bar{J}''(\bar{\omega})$ , on chromosome 17 in mouse ES, NPC, and CN cells.

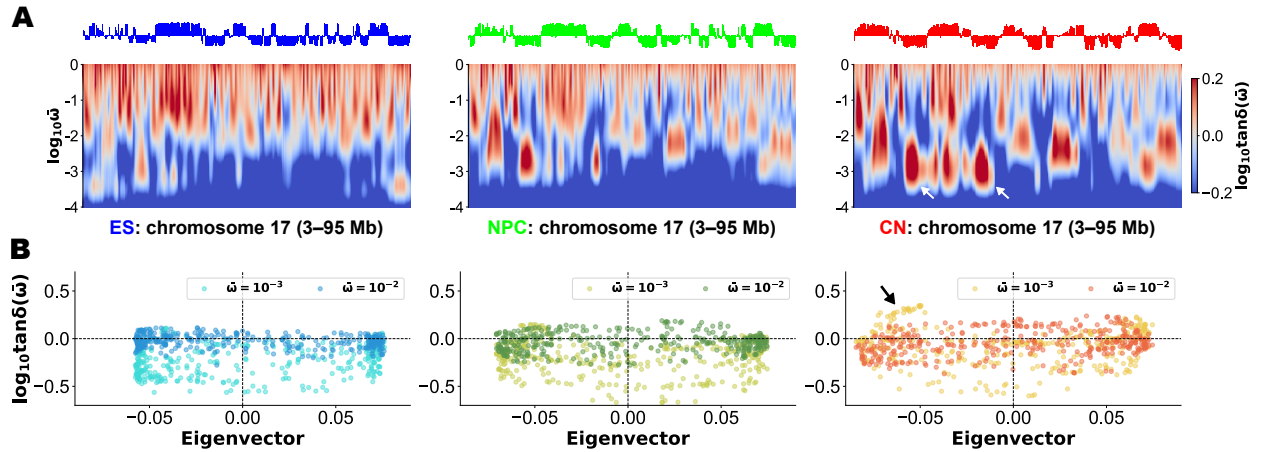

**Figure S5:** (A) Eigenvectors and spectra of the loss tangent  $\tan \delta(\bar{\omega})$  for chromosome 17 in mouse embryonic stem (ES) (Left), neural progenitor (NPC) (Middle), and cortical neuron (CN) (Right) cells at 250-kb resolution. Along the genomic coordinate and the logarithmic frequency  $\log_{10} \bar{\omega}$ , a spectrum of  $\tan \delta(\bar{\omega})$  is depicted as a heat-map. White arrows for CN indicate definite “island” regions around  $\bar{\omega} = 10^{-3}$  with negative eigenvectors. (B) Scatter plots between the logarithmic loss tangent and the eigenvalue for  $\bar{\omega} = 10^{-2}$  and  $\bar{\omega} = 10^{-3}$ . For CN, the black arrow indicates the appearance of the “islands” in (A).

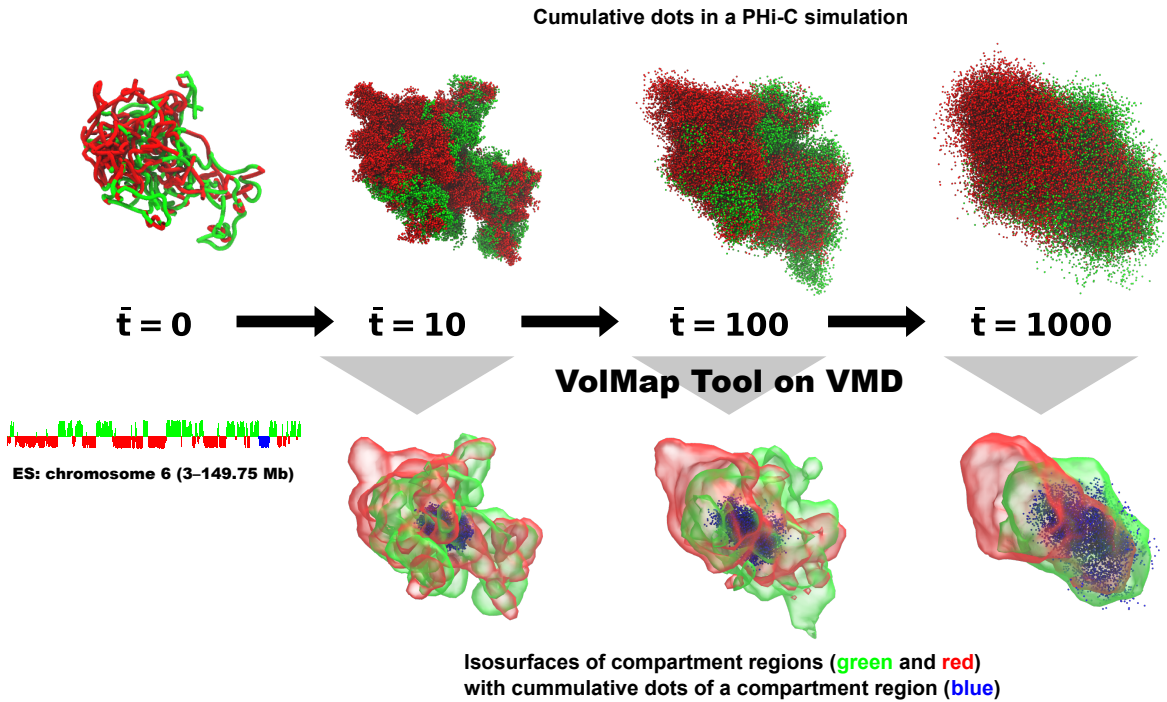

**Figure S6:** Isosurface plotting of compartment regions by VolMap Tool on VMD (33). According to an eigenvector profile of a Hi-C matrix, compartment regions of an initial polymer conformation at  $\bar{t} = 0$  are labeled by green and red colors. A PHi-C simulation provides cumulative dots within a time interval. VolMap Tool on VMD allows for converting the labeled cumulative dots into isosurfaces of compartment regions.



Table S1:  $p$ -values by a two-sided Wilcoxon rank sum test in the cumulative probability analysis for chromosomes 6 and 17 in mouse embryonic stem (ES), neural progenitor (NPC), and cortical neuron (CN) cells.

|               |     | $\bar{\omega} = 10^{-1}$ | $\bar{\omega} = 10^{-2}$ | $\bar{\omega} = 10^{-3}$ |
|---------------|-----|--------------------------|--------------------------|--------------------------|
| chromosome 6  | ES  | $9.42 \times 10^{-6}$    | $9.44 \times 10^{-6}$    | $1.04 \times 10^{-5}$    |
|               | NPC | $2.64 \times 10^{-5}$    | $5.08 \times 10^{-4}$    | $2.60 \times 10^{-4}$    |
|               | CN  | $4.43 \times 10^{-4}$    | $9.43 \times 10^{-4}$    | $2.91 \times 10^{-2}$    |
| chromosome 17 | ES  | $3.10 \times 10^{-5}$    | $4.46 \times 10^{-5}$    | $1.87 \times 10^{-4}$    |
|               | NPC | $3.18 \times 10^{-4}$    | $2.11 \times 10^{-3}$    | $1.64 \times 10^{-2}$    |
|               | CN  | $2.44 \times 10^{-5}$    | $1.87 \times 10^{-4}$    | $5.35 \times 10^{-3}$    |

## Supporting Videos

**Video S1:** A PHi-C simulation for chromosome 6 in mouse embryonic stem cells within time  $\bar{t} = 10$  regarding Fig. 3B. Here  $10^4$  steps of numerical integration were carried out with the normalized step time  $\epsilon = 0.001$ . Pink and blue dots represent the genomic positions at the peaks and troughs of  $|\bar{J}^*(\bar{\omega} = 10^{-1})|$  in Fig. 3A.

**Video S2:** Spinning 3D structure of cumulative dots of the peaks and troughs in the simulation (Video S1) within time  $\bar{t} = 10$  regarding Fig. 3B.

**Video S3:** Time evolution of the Cole-Cole plots between the normalized storage and loss compliances,  $\bar{J}'(\bar{\omega})$  and  $\bar{J}''(\bar{\omega})$ , from  $\bar{\omega} = 10^{-1}$  to  $10^{-3}$  within chromosome 6 in mouse embryonic stem (Left; blue), neural progenitor (Middle; green), and cortical neuron (Right; red) cells.

**Video S4:** A PHi-C simulation for chromosome 6 in mouse embryonic stem cells within time  $\bar{t} = 10$ , which is identical to the dynamics in Video S1. According to an eigenvector profile of a Hi-C matrix, compartment regions with positive and negative eigenvectors are labeled by green and red colors, respectively.

**Video S5:** Spinning green- and red-labeled 3D compartments (Upper) with positive and negative eigenvectors, respectively, for chromosome 6 in mouse embryonic stem cells and the labeled cumulative dots (Lower) in the PHi-C simulation for time intervals  $\bar{t} = 10$  (Left), 100 (Middle), and 1000 (Right).

**Video S6:** A PHi-C simulation for chromosome 6 in mouse neural progenitor cells within time  $\bar{t} = 10$ . Here  $10^4$  steps of numerical integration were carried out with the normalized step time  $\epsilon = 0.001$ . According to an eigenvector profile of a Hi-C matrix, compartment regions with positive and negative eigenvectors are labeled by green and red colors, respectively.

**Video S7:** Spinning green- and red-labeled 3D compartments (Upper) with positive and negative eigenvectors, respectively, for chromosome 6 in mouse neural progenitor cells and the labeled cumulative dots (Lower) in the PHi-C simulation for time intervals  $\bar{t} = 10$  (Left), 100 (Middle), and 1000 (Right).

**Video S8:** A PHi-C simulation for chromosome 6 in mouse cortical neuron cells within time  $\bar{t} = 10$ . Here  $10^4$  steps of numerical integration were carried out with the normalized step time  $\epsilon = 0.001$ . According to an eigenvector profile of a Hi-C matrix, compartment regions with positive and negative eigenvectors are labeled by green and red colors, respectively.

**Video S9:** Spinning green- and red-labeled 3D compartments (Upper) with positive and negative eigenvectors, respectively, for chromosome 6 in mouse cortical neuron cells and the labeled cumulative dots (Lower) in the PHi-C simulation for time intervals  $\bar{t} = 10$  (Left), 100 (Middle), and 1000 (Right).
